# Supplementary material for: Platelet-Derived Extracellular Vesicles Stimulate Migration through Partial Remodelling of the Ca2+ Handling Machinery in MDA-MB-231 Breast Cancer Cells
Source: MDPI journal article supplement (doi:10.3390/cells11193120), 2022-10-04
Supplement: s1 [file s1]

## Supplementary Information

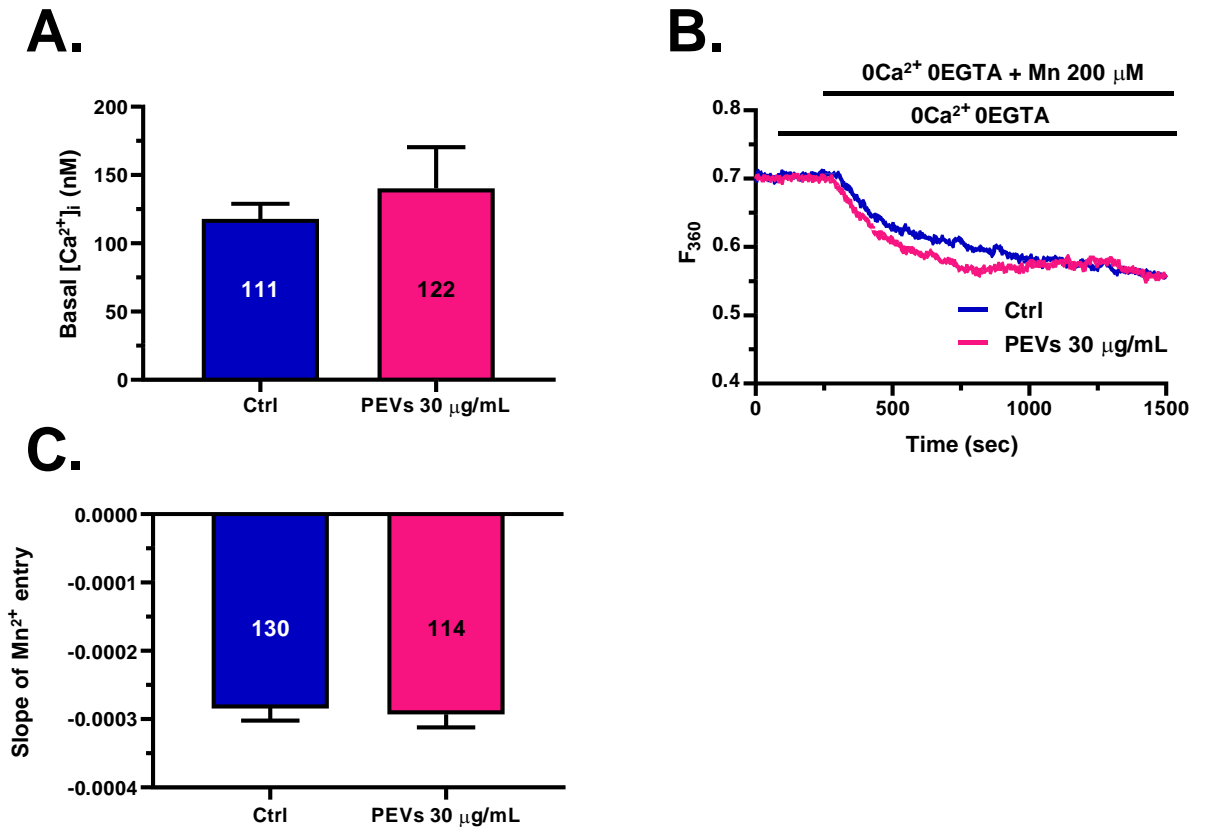

**Figure 1. Long-term exposure of MDA-MB-231 cells with PEVs did not affect basal  $[Ca^{2+}]_i$  and constitutive  $Ca^{2+}$  entry.** **A.** Evaluation of resting  $[Ca^{2+}]_i$  did not reveal any difference between control (Ctrl) cells and cells treated with PEVs (30  $\mu\text{g/mL}$ , 24 h). Basal was evaluated by using the Grynkiewicz equation, as shown elsewhere [35]. **B.** Resting  $Ca^{2+}$  entry in MDA-MB-231 cells was evaluated by using the  $Mn^{2+}$ -quenching technique, as described in Materials and methods. The extracellular physiological solution was first replaced with a 0Ca<sup>2+</sup> solution and then 200  $\mu\text{M}$   $Mn^{2+}$  was added to cause an immediate decay in Fura-2 fluorescence, which is consistent with the occurrence of constitutive  $Ca^{2+}$  entry. Resting  $Mn^{2+}$  influx in MDA-MB-231 cells was not impaired by the treatment with PEVs (30  $\mu\text{g/mL}$ , 24 h). The rate of fluorescence decay for each individual tracing was calculated as the slope of a linear regression. **C.** Mean  $\pm$  SEM of the quenching rate of Fura-2 fluorescence induced by  $Mn^{2+}$  addition in control (Ctrl) and treated cells.



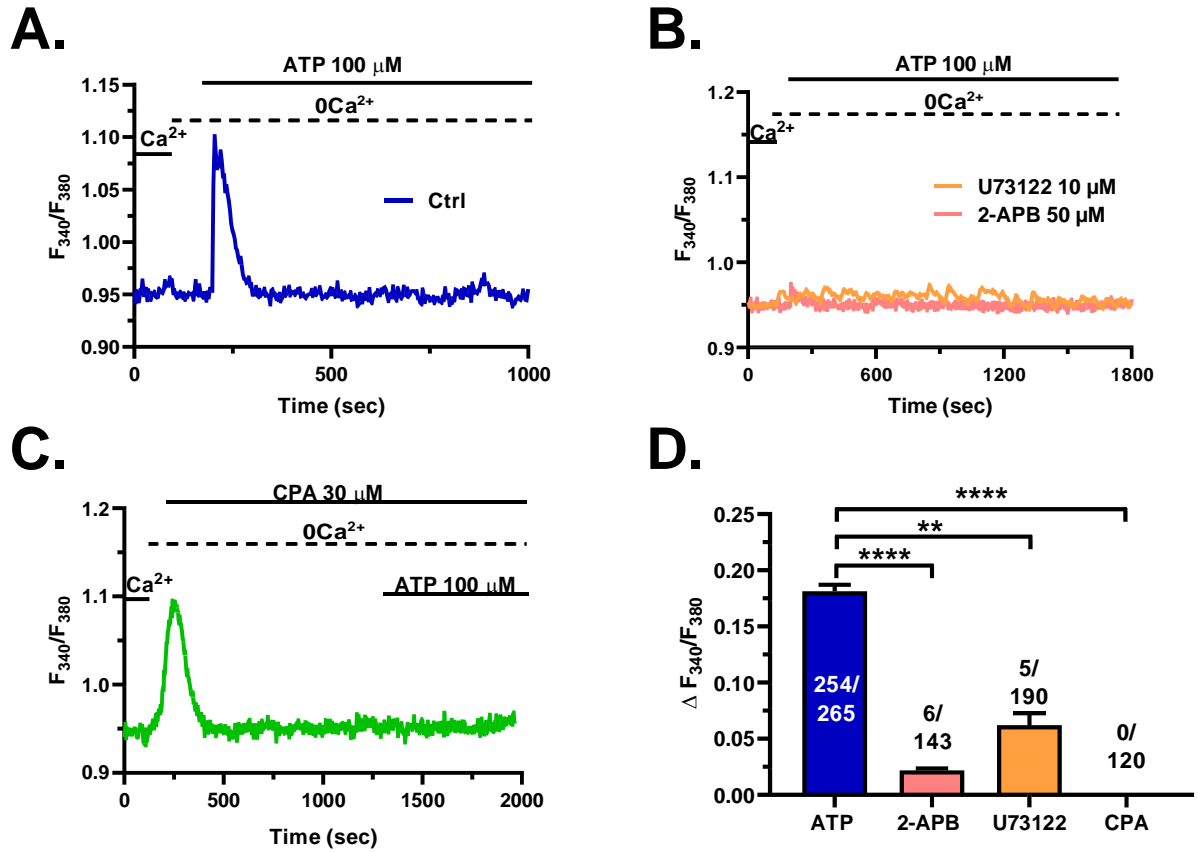

**Figure S2. InsP $_3$ -dependent ER  $\text{Ca}^{2+}$  mobilization supports ATP-induced intracellular  $\text{Ca}^{2+}$  release in MDA-MB-231 cells.** **A.** Intracellular  $\text{Ca}^{2+}$  release evoked by ATP (100  $\mu\text{M}$ ) in untreated (Ctrl) MDA-MB-231 cells in the absence of extracellular  $\text{Ca}^{2+}$  ( $0\text{Ca}^{2+}$ ). **B.** ATP-evoked intracellular  $\text{Ca}^{2+}$  release was largely suppressed by blocking PLC $\beta$  activity with U73122 (10  $\mu\text{M}$ , 30 min) and inhibiting InsP $_3$ Rs with 2-APB (50  $\mu\text{M}$ , 30 min). **C.** ATP-evoked intracellular  $\text{Ca}^{2+}$  release was abrogated upon depletion of the ER  $\text{Ca}^{2+}$  pool with CPA (30  $\mu\text{M}$ ) under  $0\text{Ca}^{2+}$  conditions. **D.** Mean  $\pm$  SE of the amplitude of ATP-evoked endogenous  $\text{Ca}^{2+}$  release under the designated treatments. \*\*\*\* indicate  $p < 0.0001$ , \*\* indicate  $p < 0.01$ .



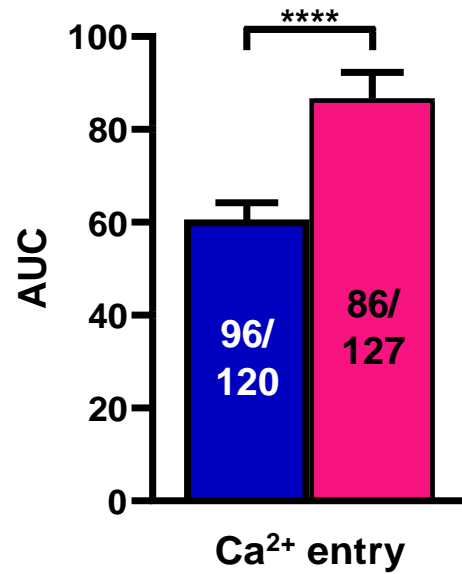

**Figure S3. Further evidence that long-term exposure of MDA-MB-231 cells with PEVs increases FBS-induced extracellular  $\text{Ca}^{2+}$  entry.** Measurement of the AUC (mean $\pm$ SE) confirmed that pre-treatment of MDA-MB-231 cells with PEVs (30  $\mu\text{g}/\text{mL}$ , 24 h) significantly increased 20% FBS-induced extracellular  $\text{Ca}^{2+}$  entry. \*\*\*\* indicate  $p < 0.0001$ .



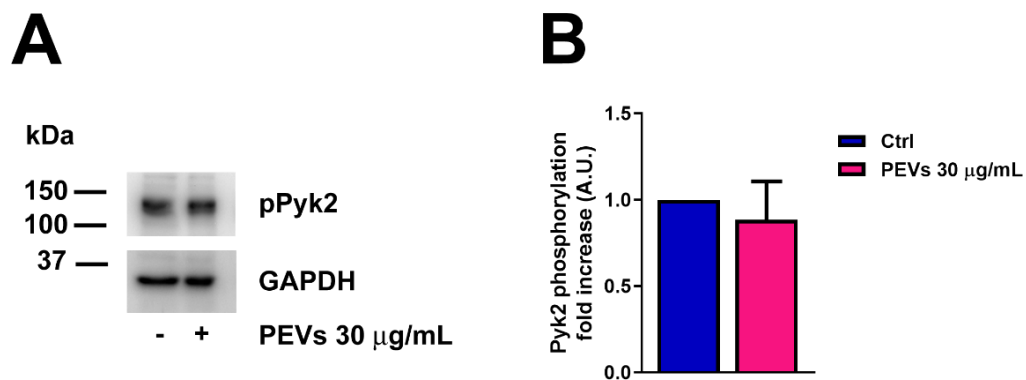

**Figure S4. Long-term exposure of MDA-MB-231 cells with PEVs did not increase Pyk2 phosphorylation.** Phosphorylation of Pyk2 (**A-B**) in MDA-MB-231 cells incubated with PEVs (30 µg/mL, 24 h) or left untreated. Representative immunoblots are reported in **A** for phospho-Pyk2 where GAPDH staining is for equal loading control. The quantification of the results is shown in **B** for phospho-pPyk2 as the mean  $\pm$  SD of three experiments.



**Table S1. Primers used for real-time qPCRs.**

| Target gene                              | Primer name | Primer sequence (5'–3') | Amplicon length (bp) |
|------------------------------------------|-------------|-------------------------|----------------------|
| SERCA2B                                  | SERCA2b_F1  | ATGCCATTGTTCTGAAGCCTC   | 136                  |
|                                          | SERCA2b_R1  | TCACCTTCCACTCTGTCCAG    |                      |
| SERCA3                                   | SERCA3_F1   | TCCGCCTCATCGAGATCAAG    | 135                  |
|                                          | SERCA3_R1   | GCATGTTCTTCTTGTCCTGGT   |                      |
| InsP <sub>3</sub> R1                     | ITPR1_F     | GGAGTTTCAGCCCTCAGTGG    | 101                  |
|                                          | ITPR1_R     | CTTCAGGCACAGAGACCAGG    |                      |
| InsP <sub>3</sub> R2                     | ITPR2_F     | CACTCTGGGAAATAGAGGTGGTT | 124                  |
|                                          | ITPR2_R     | TCAGGATTAAGCTCTGCAGCTA  |                      |
| InsP <sub>3</sub> R3                     | ITPR3_F1    | GCTTCATCAGCACTTTGGGG    | 104                  |
|                                          | ITPR3_R1    | CTTGAAGAGGCAGTCACGGA    |                      |
| STIM1                                    | STIM1_F1    | GCCCTGTGGCTCCTCTG       | 130                  |
|                                          | STIM1_R1    | TTCGGCAAACTCTGCTGC      |                      |
| Orai1                                    | ORAI1_F     | GCTTCGCCATGGTGGCAAT     | 127                  |
|                                          | ORAI1_R     | ATCATGAGCGCAAACAGGTG    |                      |
| Actin beta <sup>1</sup>                  | ACTB_alt1_F | GGACCTGACTGACTACCTCAT   | 107                  |
|                                          | ACTB_alt1_R | CGTAGCACAGCTTCTCCTTAAT  |                      |
| Glyceraldehyde-3-phosphate dehydrogenase | GAPDH_alt_F | CGGGAAACTGTGGCGTGATGG   | 120                  |
|                                          | GAPDH_alt_R | GCCATGCCAGTGAGCTTCCC    |                      |
